# Supplementary material for: LRG1 is an adipokine that promotes insulin sensitivity and suppresses inflammation
Source: eLife journal article supplement (doi:10.7554/elife.81559), 2022-11-07

Figure 7—source data 1

Figure 7A

LRG1

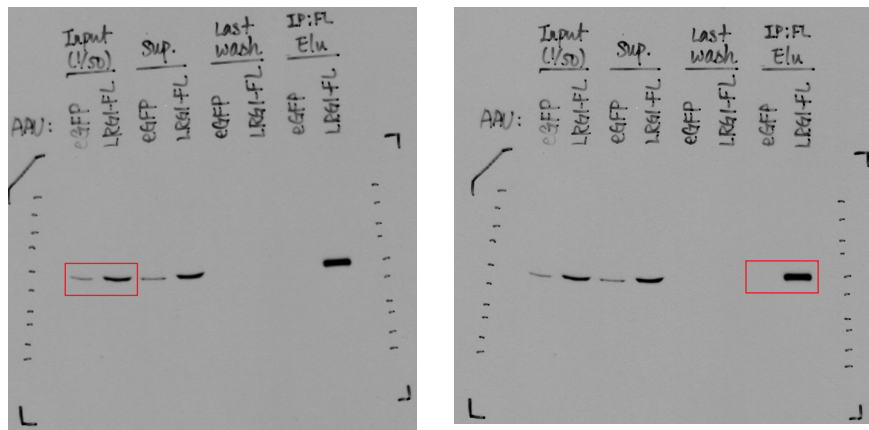

Cyt c

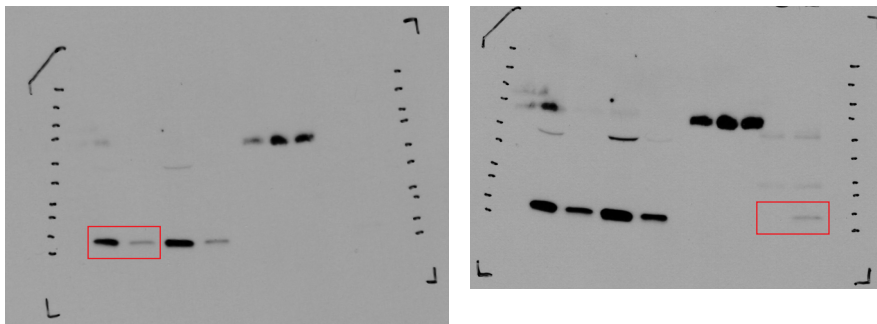

Ponceau S

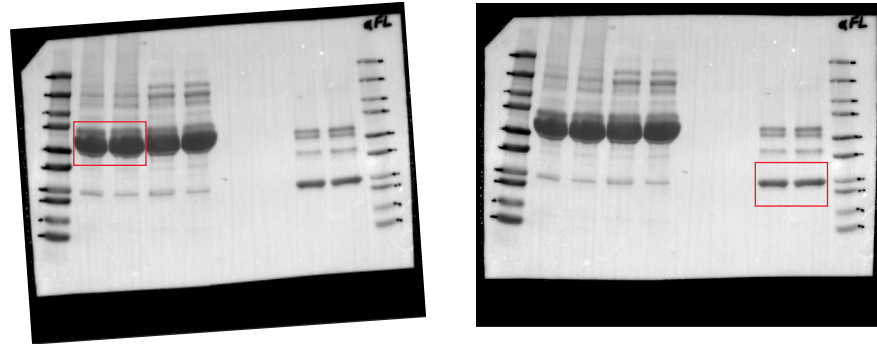

Figure 7B

Cyt c

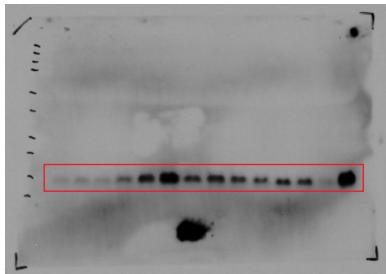

Ponceau S

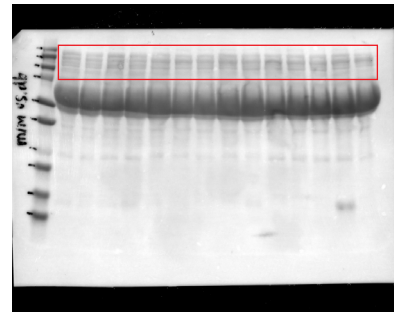

Figure 7D

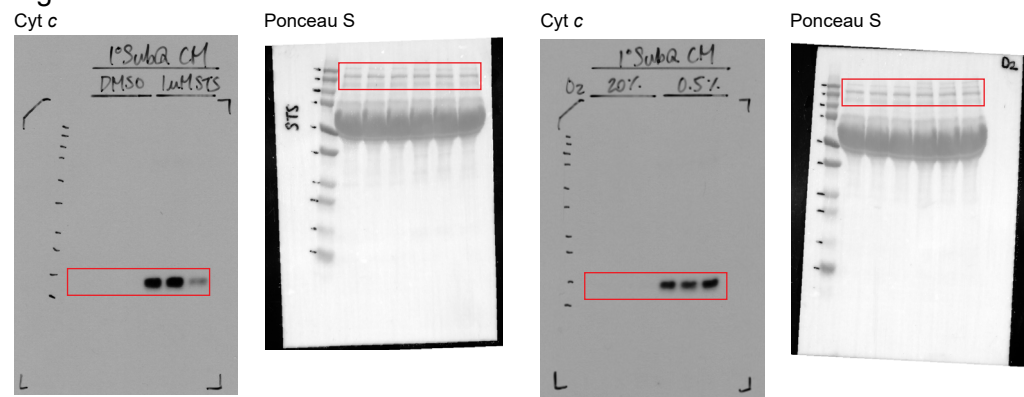

Figure 7E

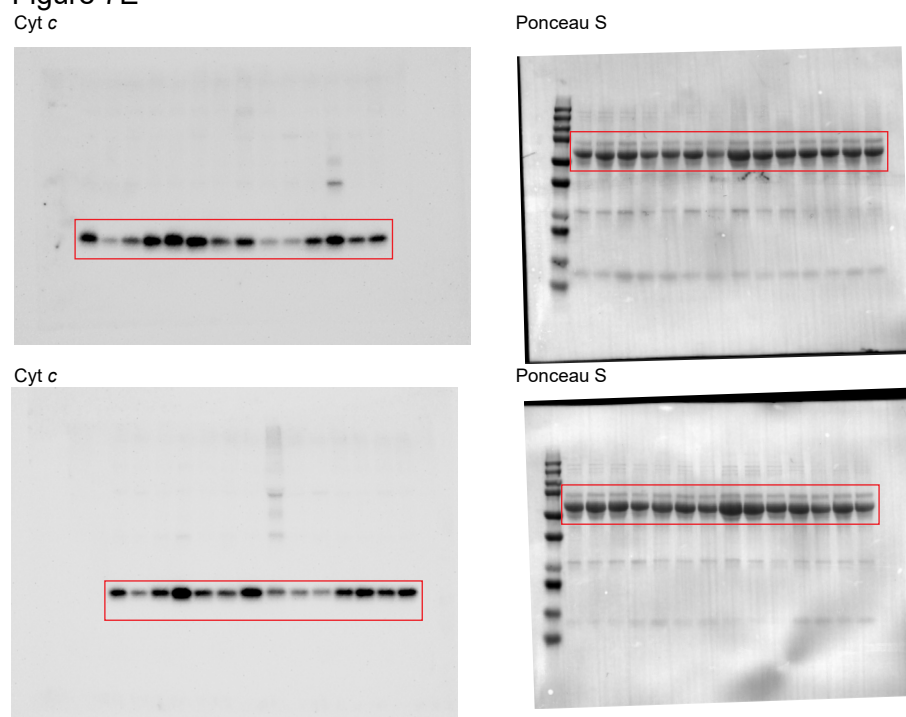

Figure 7H

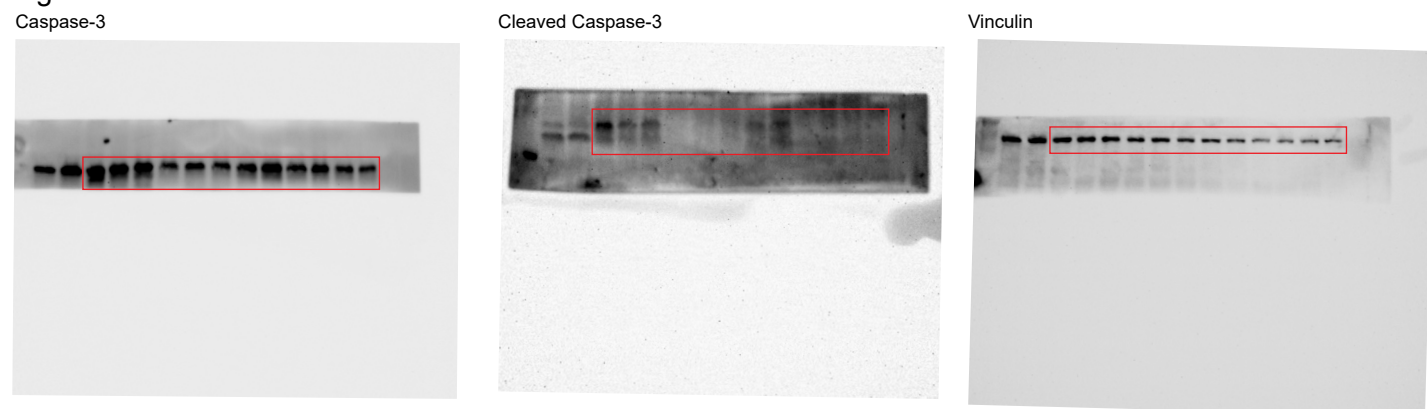

Figure 7I

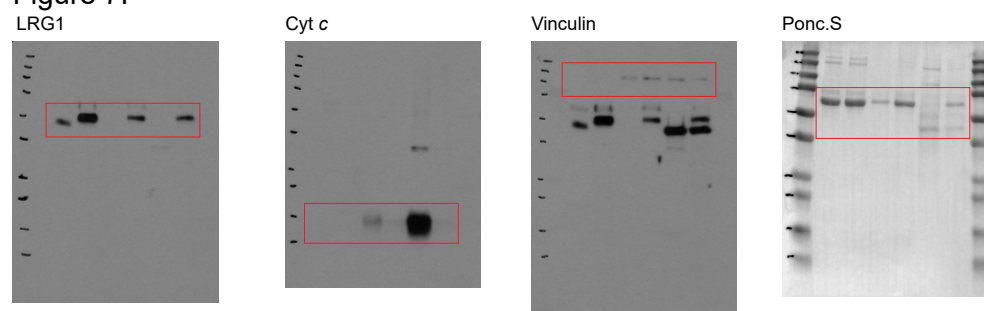

Figure 7—figure supplement 1C

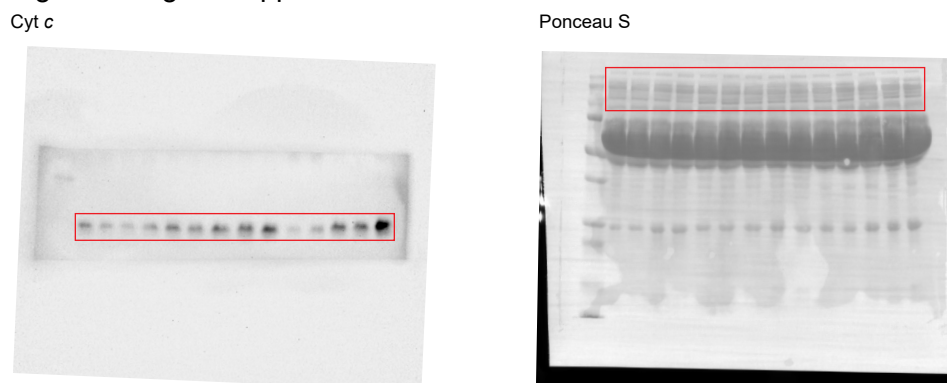

Figure 7—figure supplement 1I

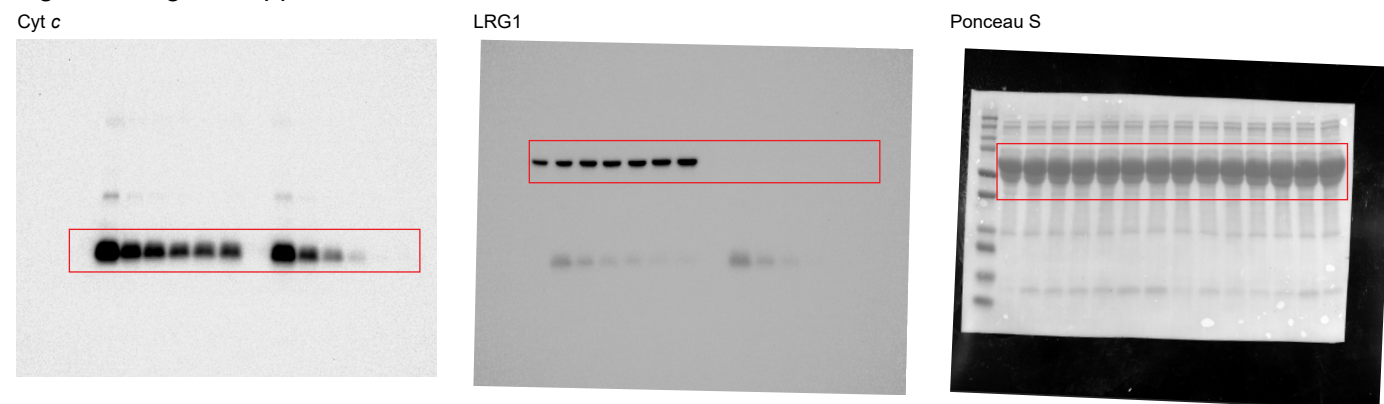

Figure 7—figure supplement 1L

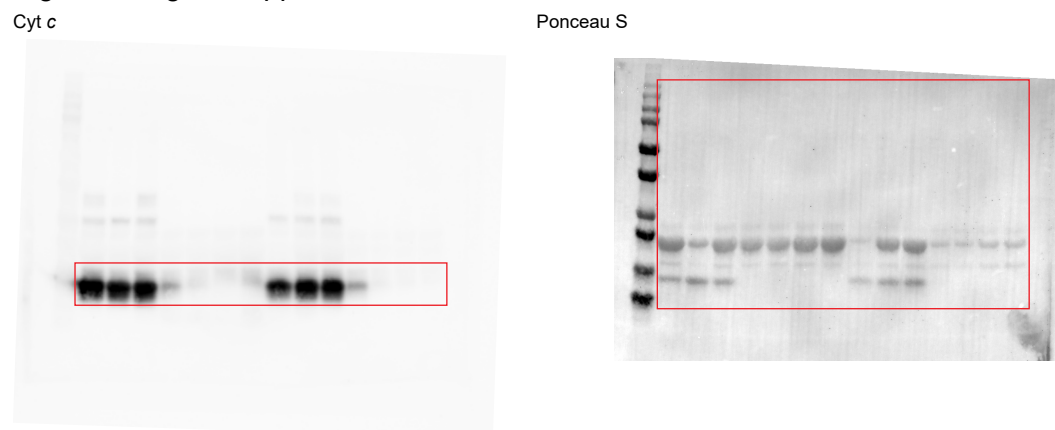

Figure 7—figure supplement 1N

Cyt c

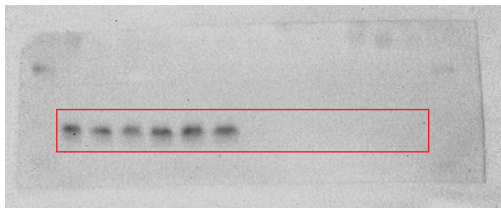

LRG1

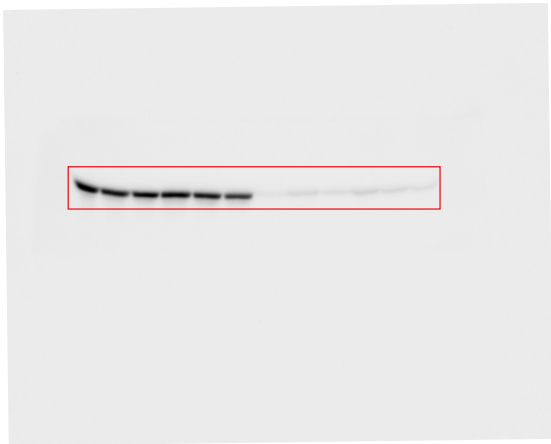

Ponceau S

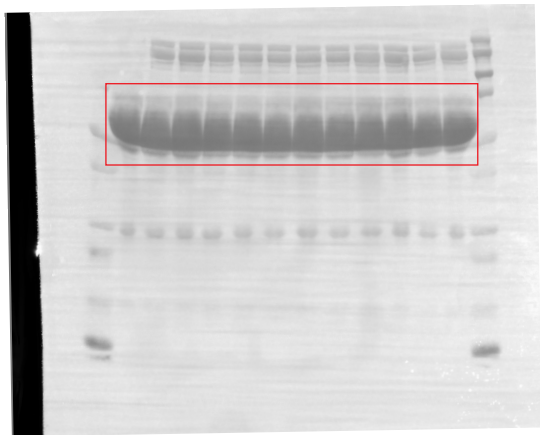

Supplement: supp [file elife-81559-supp-v1.zip]
