# Supplementary material for: LRG1 is an adipokine that promotes insulin sensitivity and suppresses inflammation
Source: eLife journal article supplement (doi:10.7554/elife.81559), 2022-11-07

Figure 5—source data 1

Figure 5B

LRG1

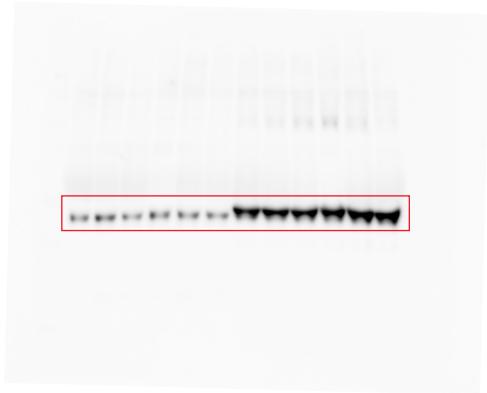

Ponceau S

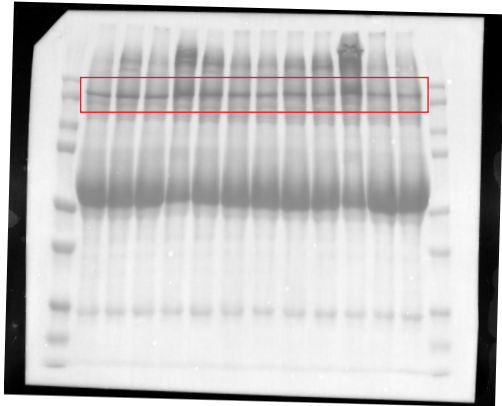

Figure 5—figure supplement 1C

LRG1

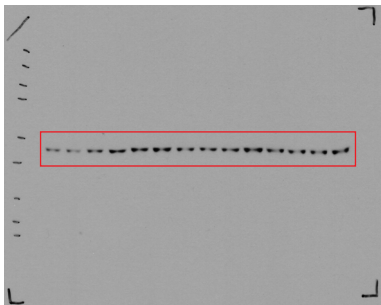

Ponceau S

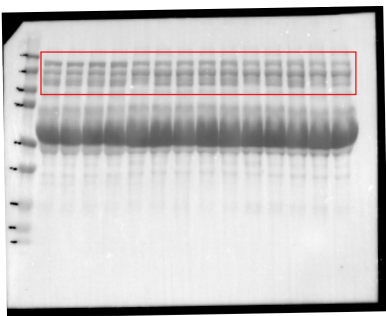

Figure 5—figure supplement 1F

LRG1

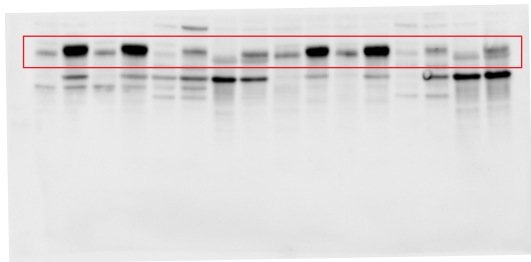

Vinculin

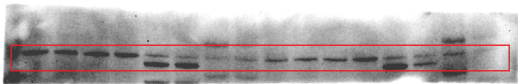

Figure 5—figure supplement 1I

IRS-1

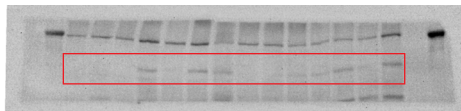

Vinculin

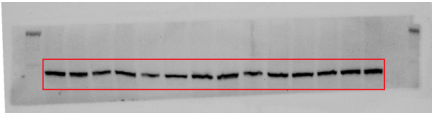

IRS-1

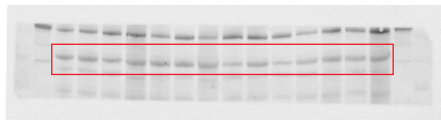

$\beta$ -actin

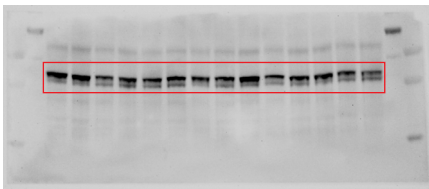

Supplement: supp [file elife-81559-supp-v1.zip]
