# Supplementary material for: LRG1 is an adipokine that promotes insulin sensitivity and suppresses inflammation
Source: eLife journal article supplement (doi:10.7554/elife.81559), 2022-11-07

Figure 4—source data 1

Figure 4B

LRG1

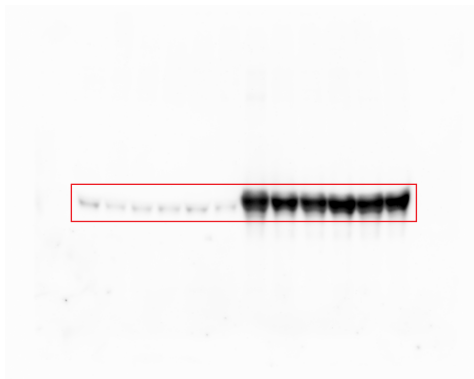

Ponceau S

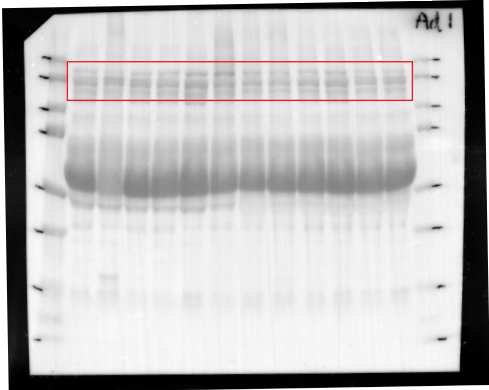

Figure 4G

LRG1

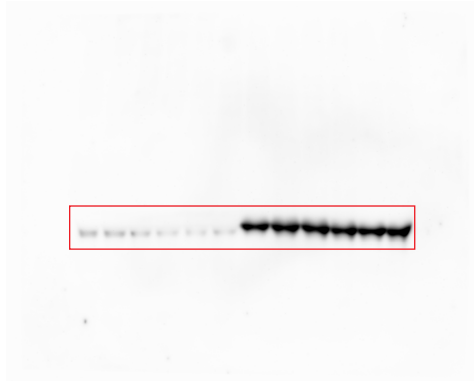

Ponceau S

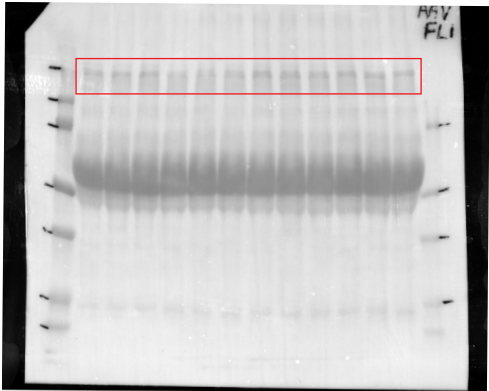

Figure 4I

LRG1

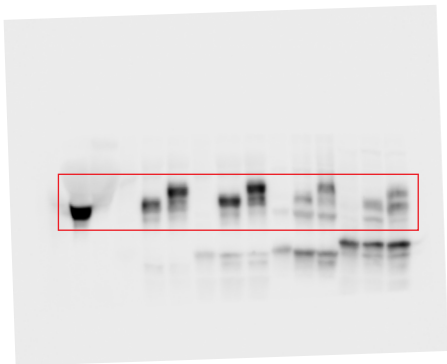

Vinculin

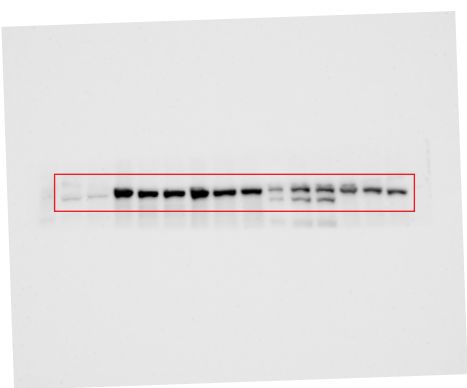

Ponceau S

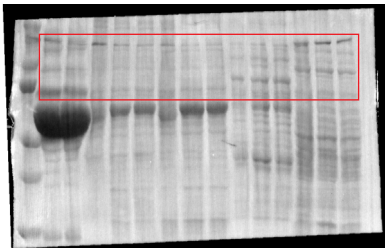

LRG1

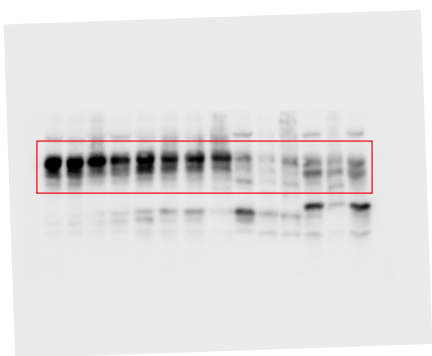

Vinculin

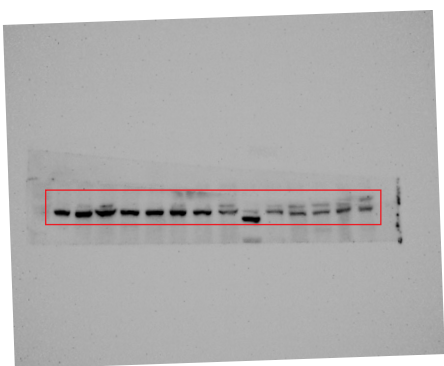

Ponceau S

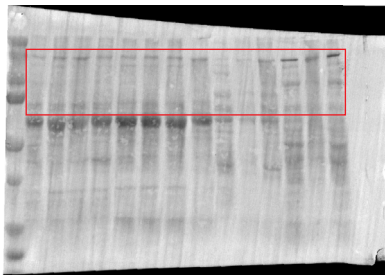

Figure 4—figure supplement 2C

LRG1

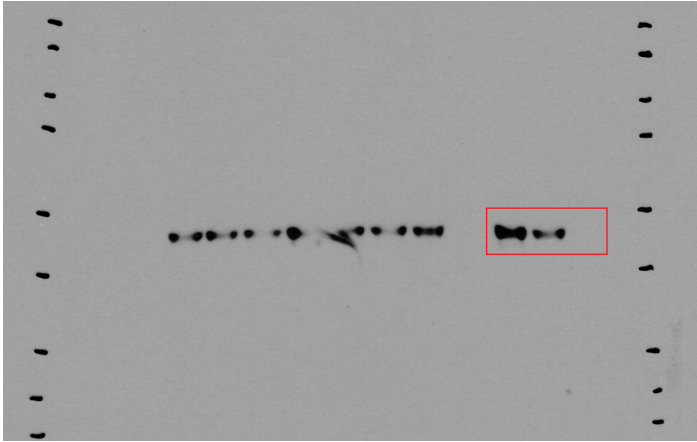

Ponceau S

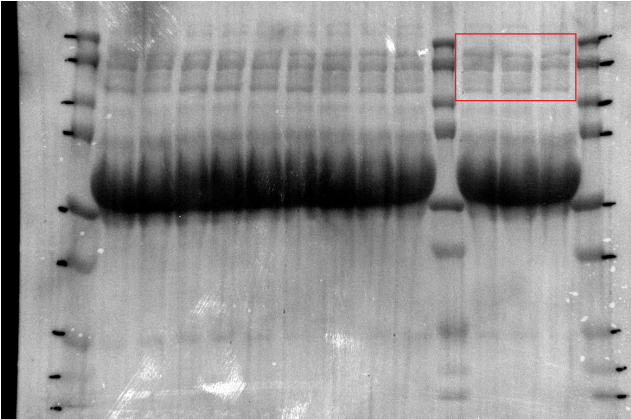

Supplement: supp [file elife-81559-supp-v1.zip]
