# Supplementary material for: LRG1 is an adipokine that promotes insulin sensitivity and suppresses inflammation
Source: eLife journal article supplement (doi:10.7554/elife.81559), 2022-11-07

Figure 3—source data 1

Figure 3E  
LRG1

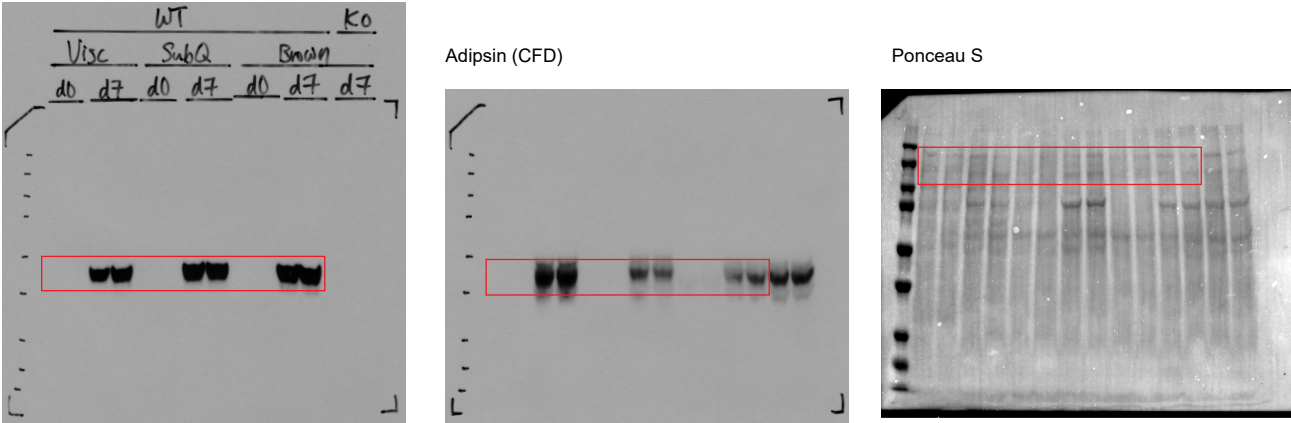

Figures 3F, 7C

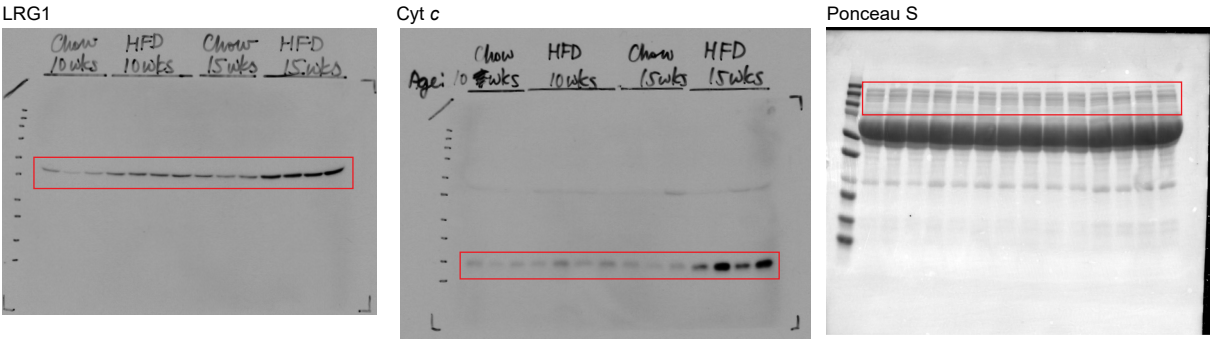

Figures 3I, 7D

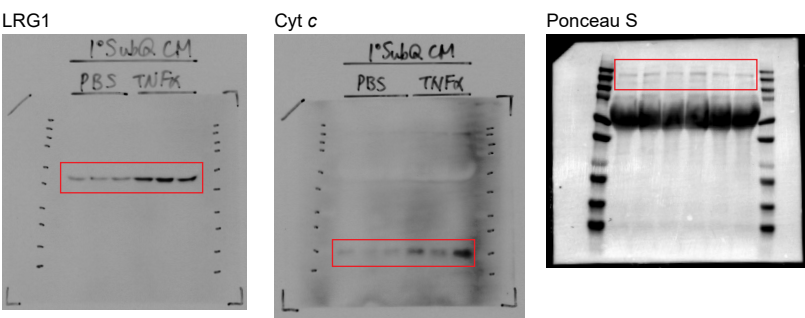

Figure 3—figure supplement 2A

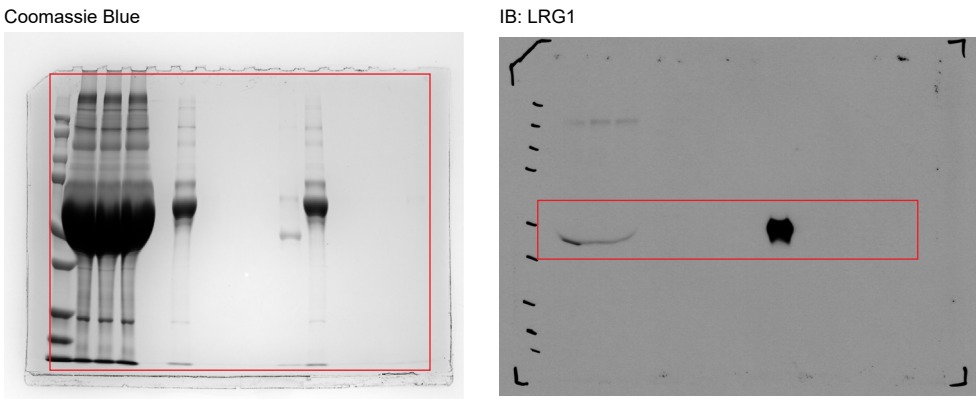

Supplement: supp [file elife-81559-supp-v1.zip]
