# Supplementary material for: LRG1 is an adipokine that promotes insulin sensitivity and suppresses inflammation
Source: eLife journal article supplement (doi:10.7554/elife.81559), 2022-11-07

## Figure 2—source data 1

Figure 2C

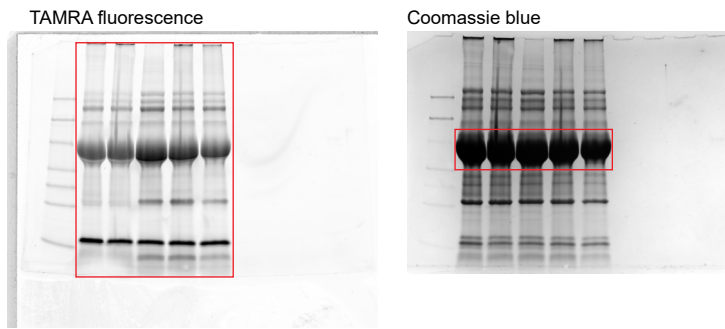

Supplement: supp [file elife-81559-supp-v1.zip]
