# Supplementary material for: LRG1 is an adipokine that promotes insulin sensitivity and suppresses inflammation
Source: eLife journal article supplement (doi:10.7554/elife.81559), 2022-11-07

# Figure 1—source data 1

Figure 1C

TAMRA fluorescence

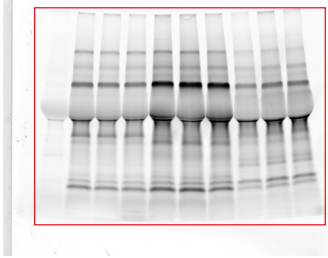

Coomassie blue

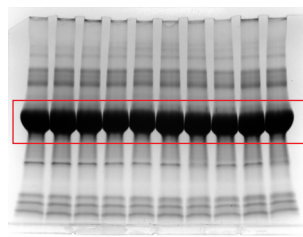

Supplement: supp [file elife-81559-supp-v1.zip]
