# Supplementary figures and images for: LRG1 is an adipokine that promotes insulin sensitivity and suppresses inflammation
Source: eLife journal article supplement (doi:10.7554/elife.81559), 2022-11-07

Figure 3—figure supplement 1

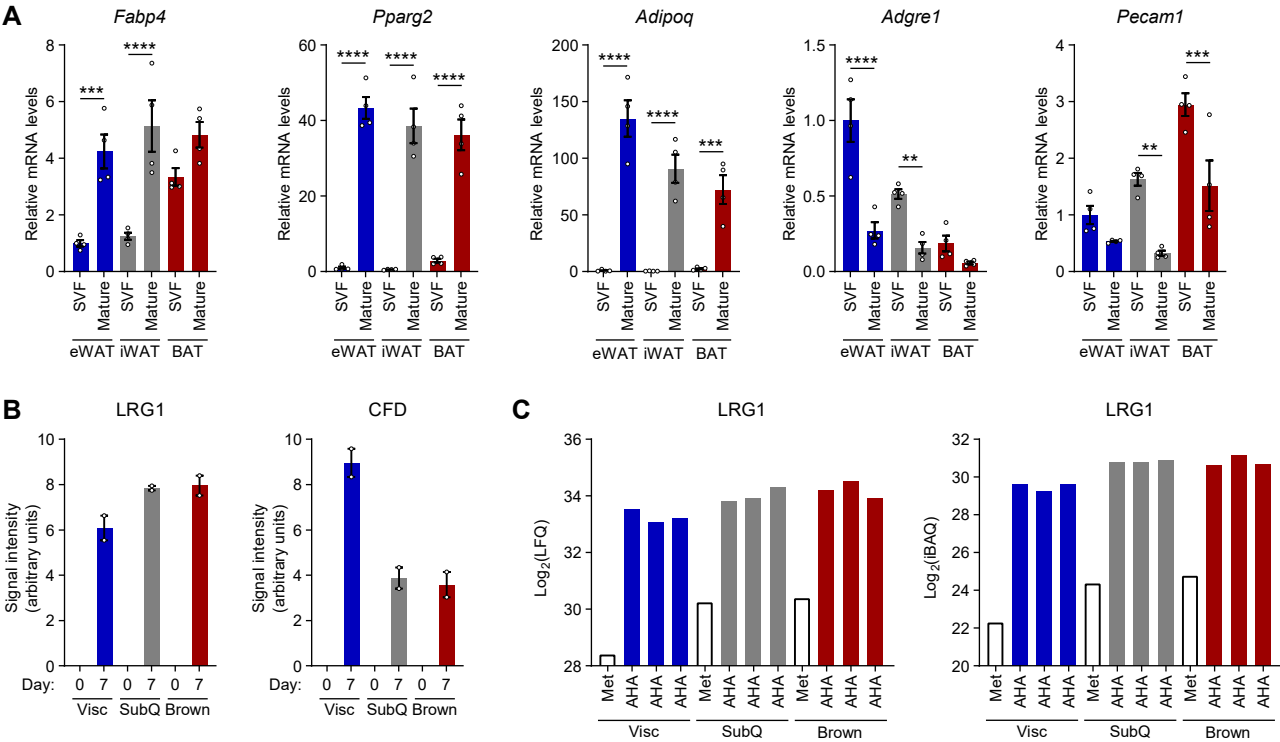

Supplement: supp [file elife-81559-supp-v1.zip]

Figure 3—figure supplement 2

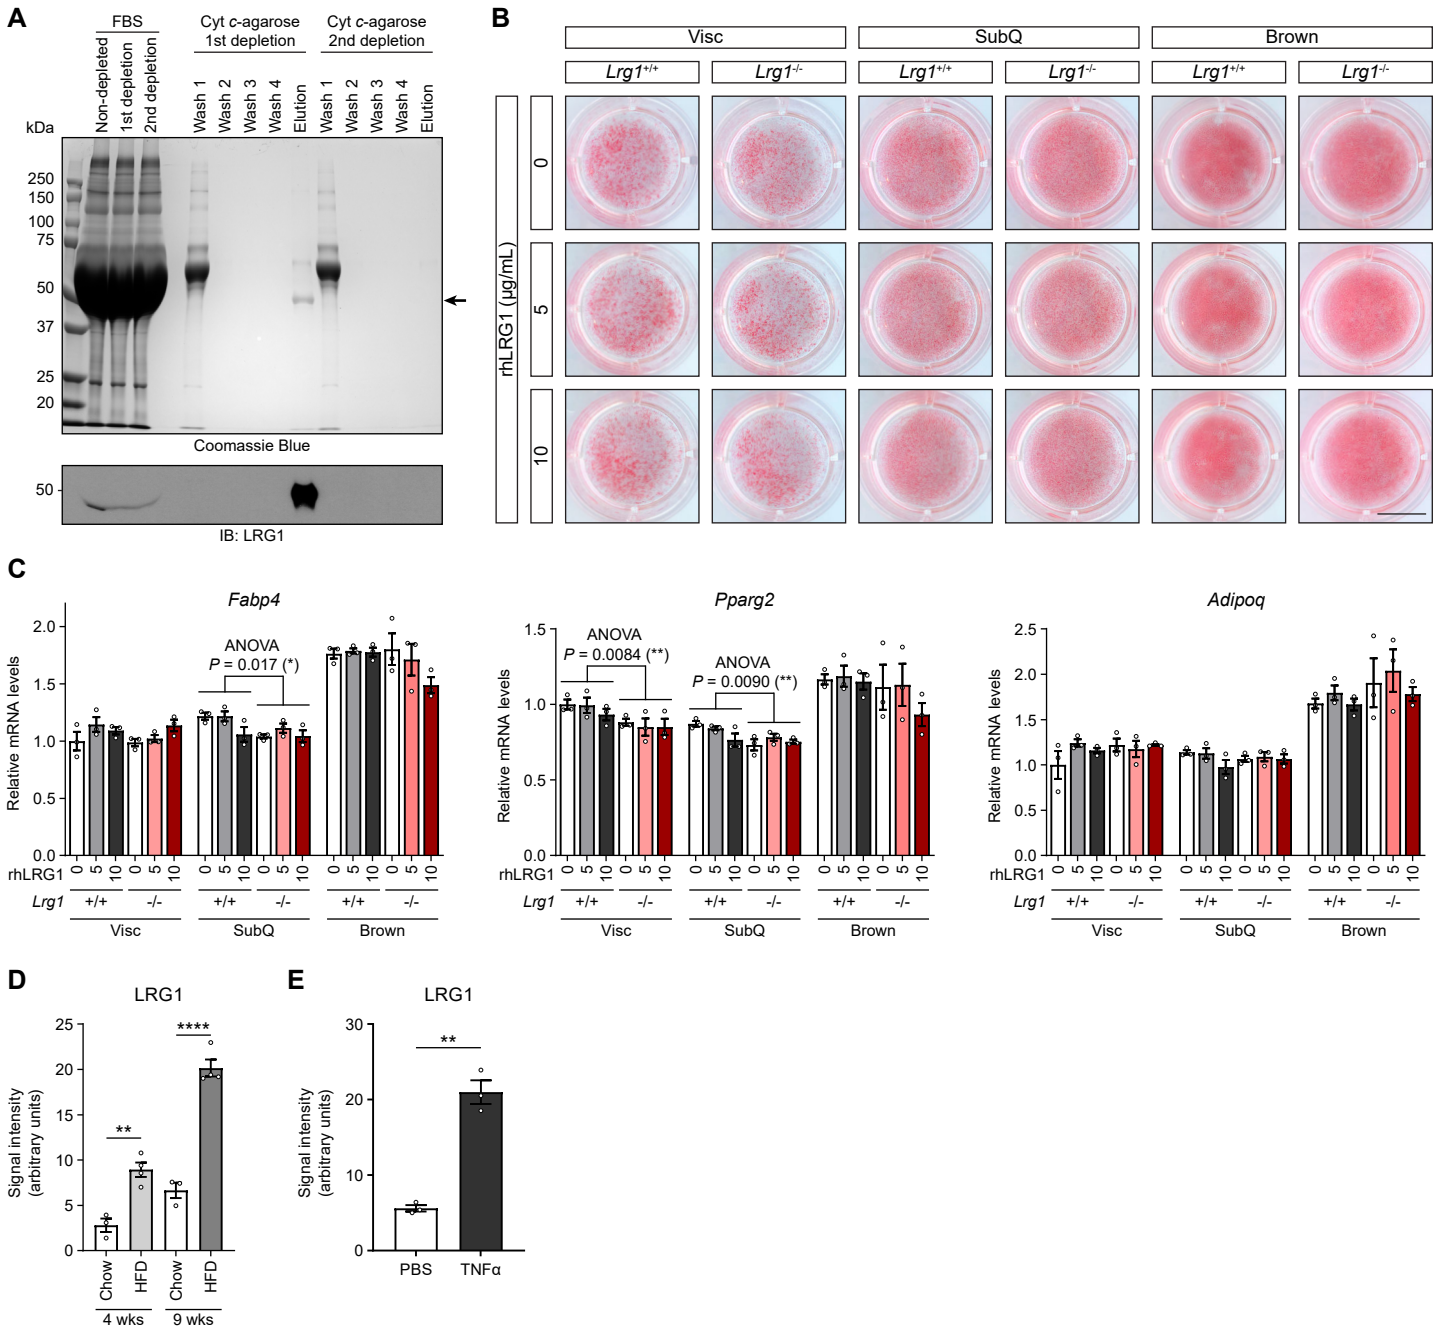

Supplement: supp [file elife-81559-supp-v1.zip]

Figure 4—figure supplement 2

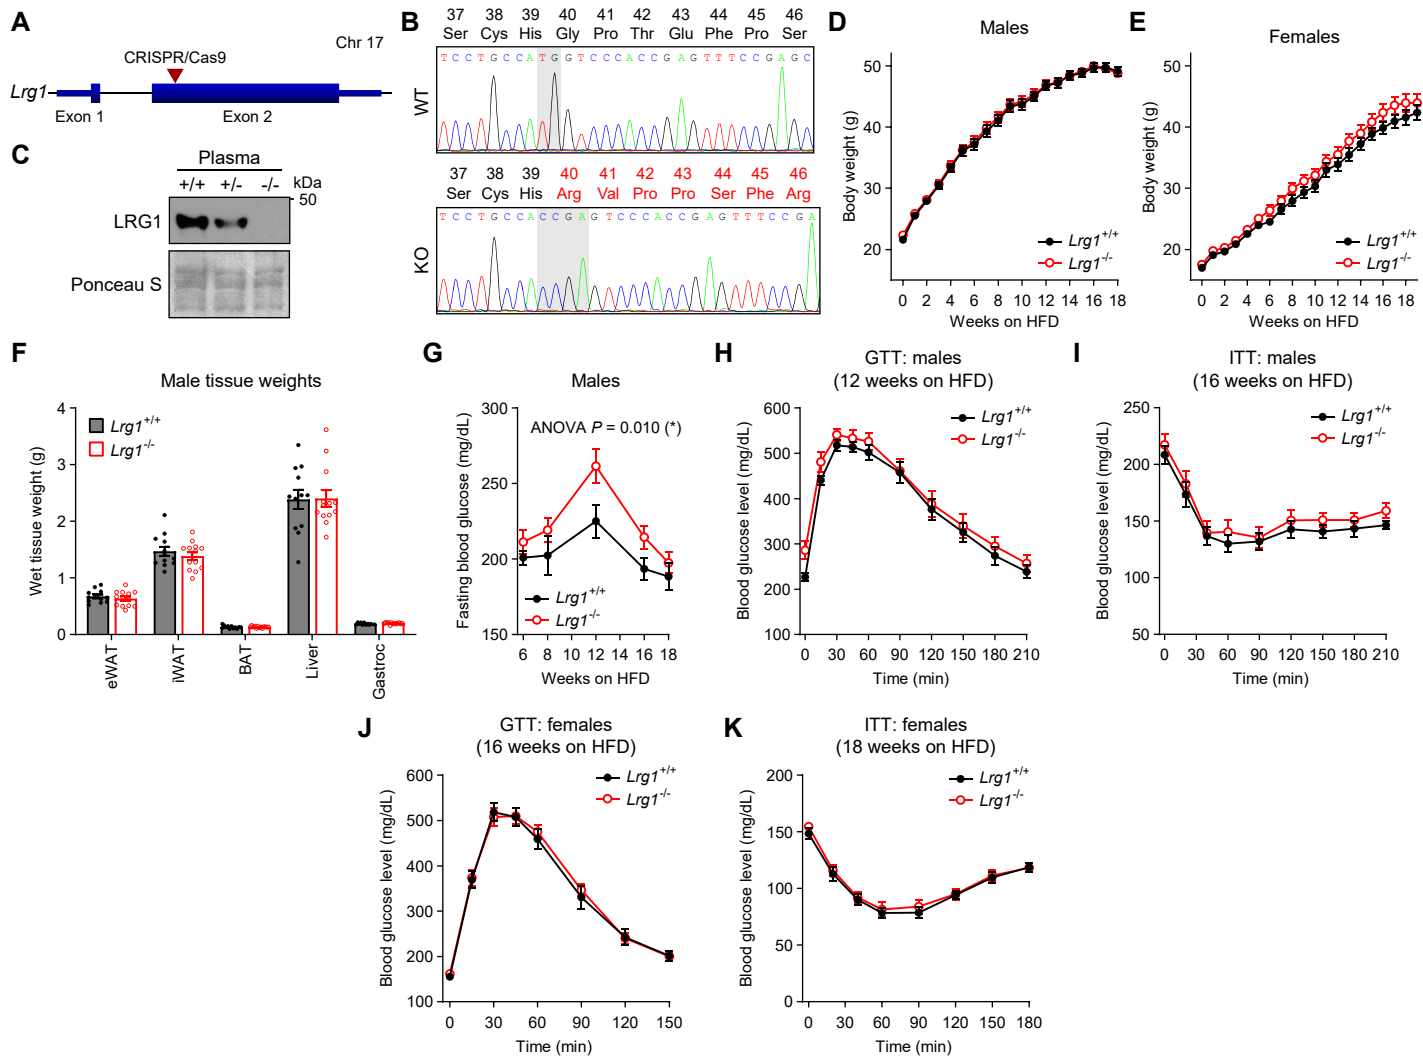

Supplement: supp [file elife-81559-supp-v1.zip]

Figure 6—figure supplement 1

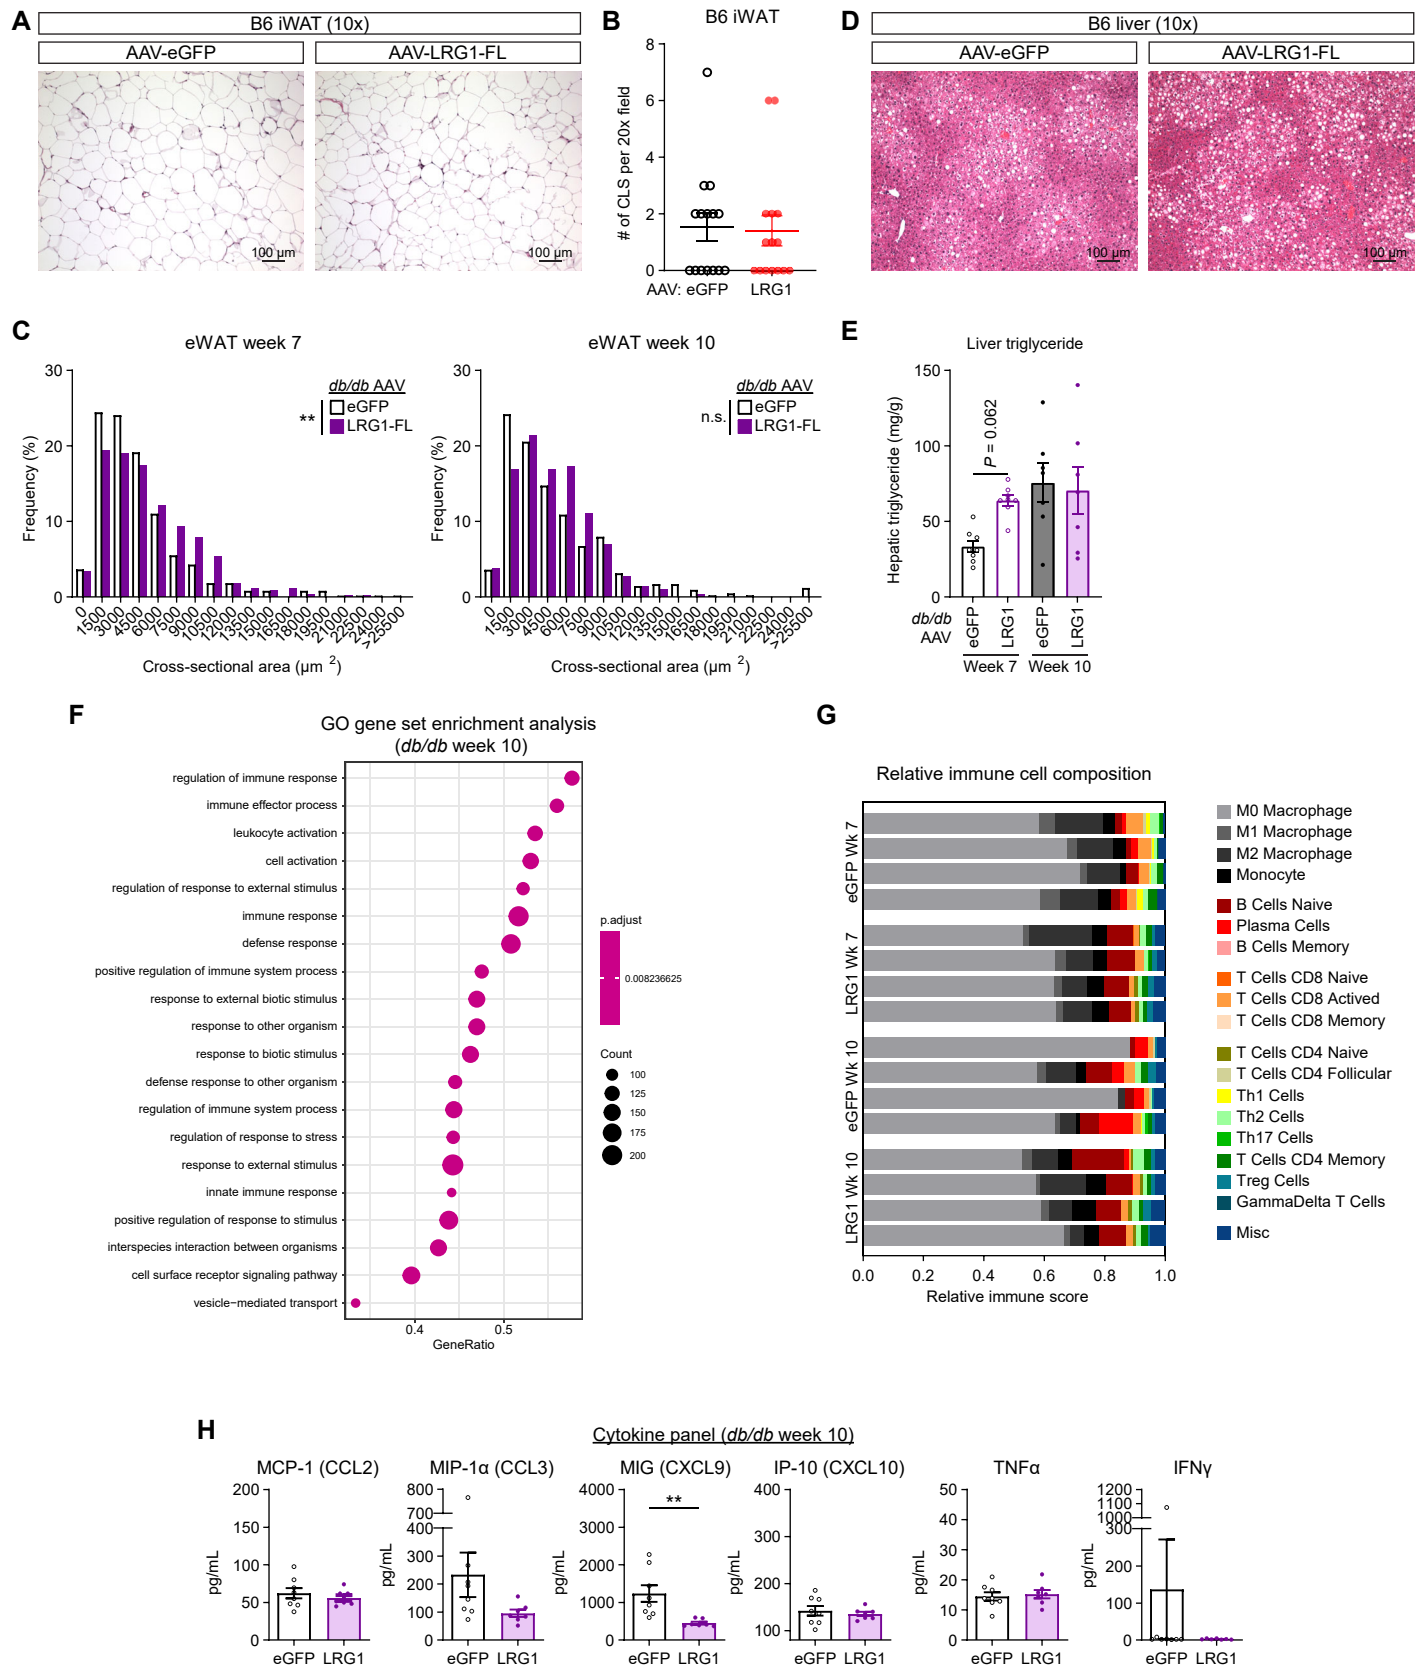

Supplement: supp [file elife-81559-supp-v1.zip]

Figure 1—figure supplement 1

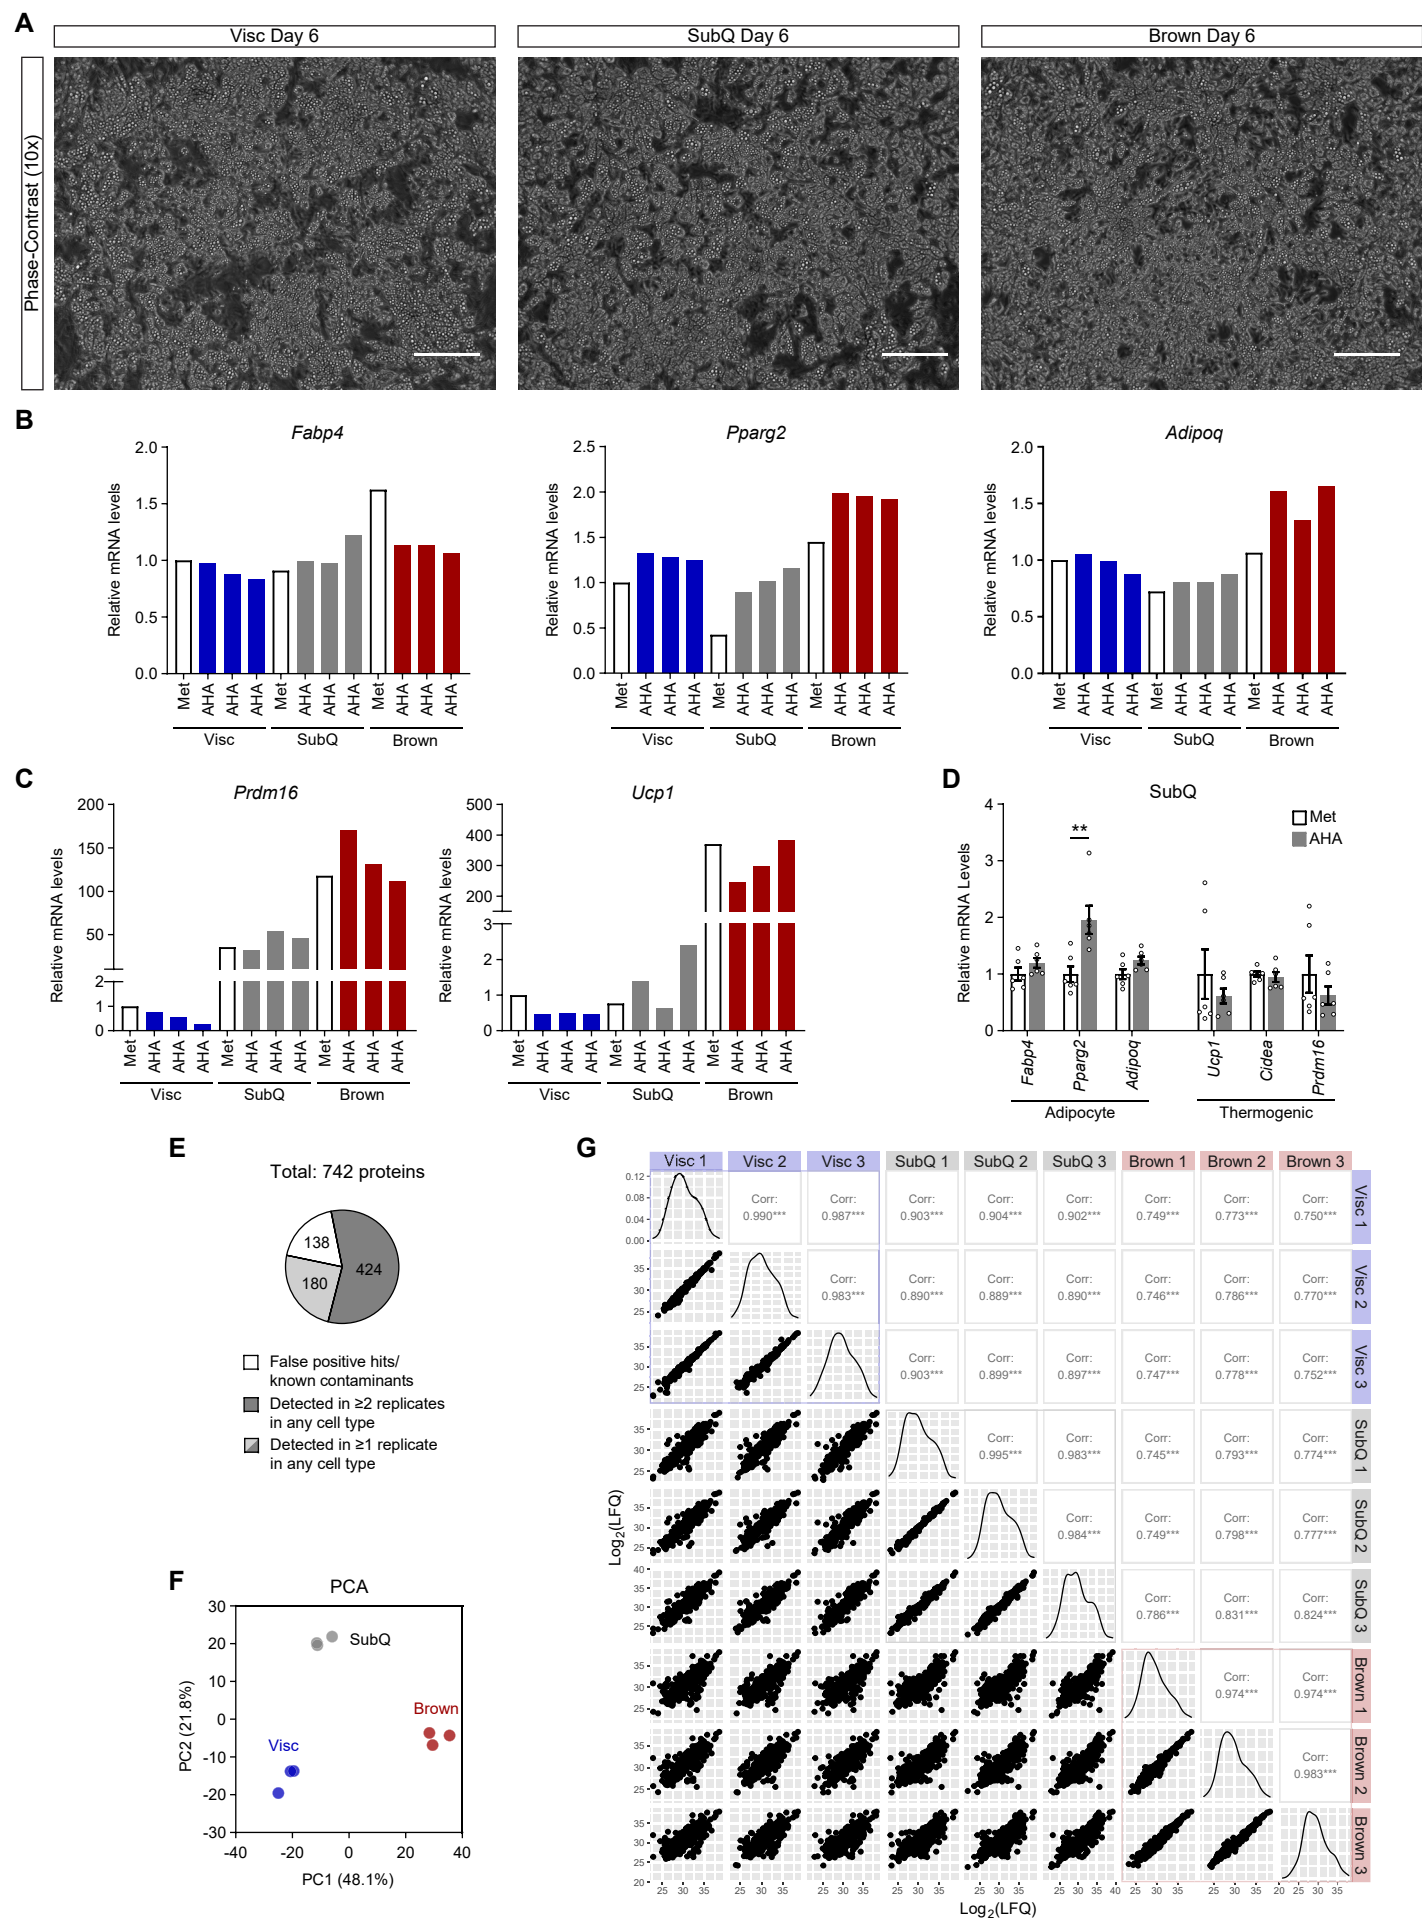

Supplement: supp [file elife-81559-supp-v1.zip]

**Figure 4—figure supplement 1**

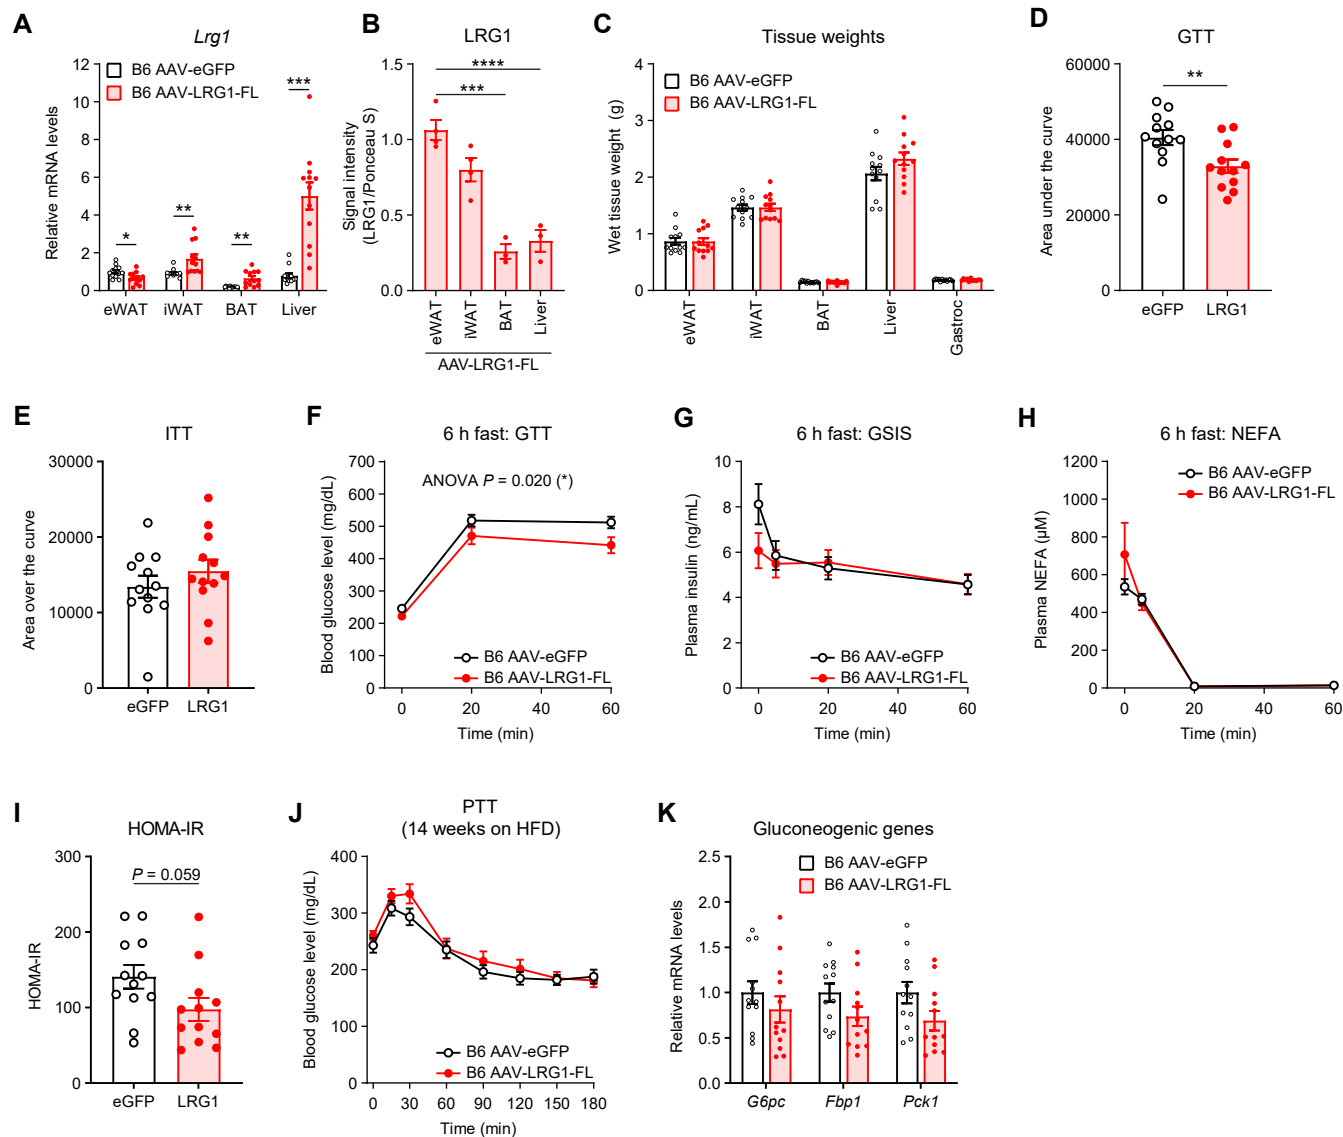

Supplement: supp [file elife-81559-supp-v1.zip]

Figure 5—figure supplement 1

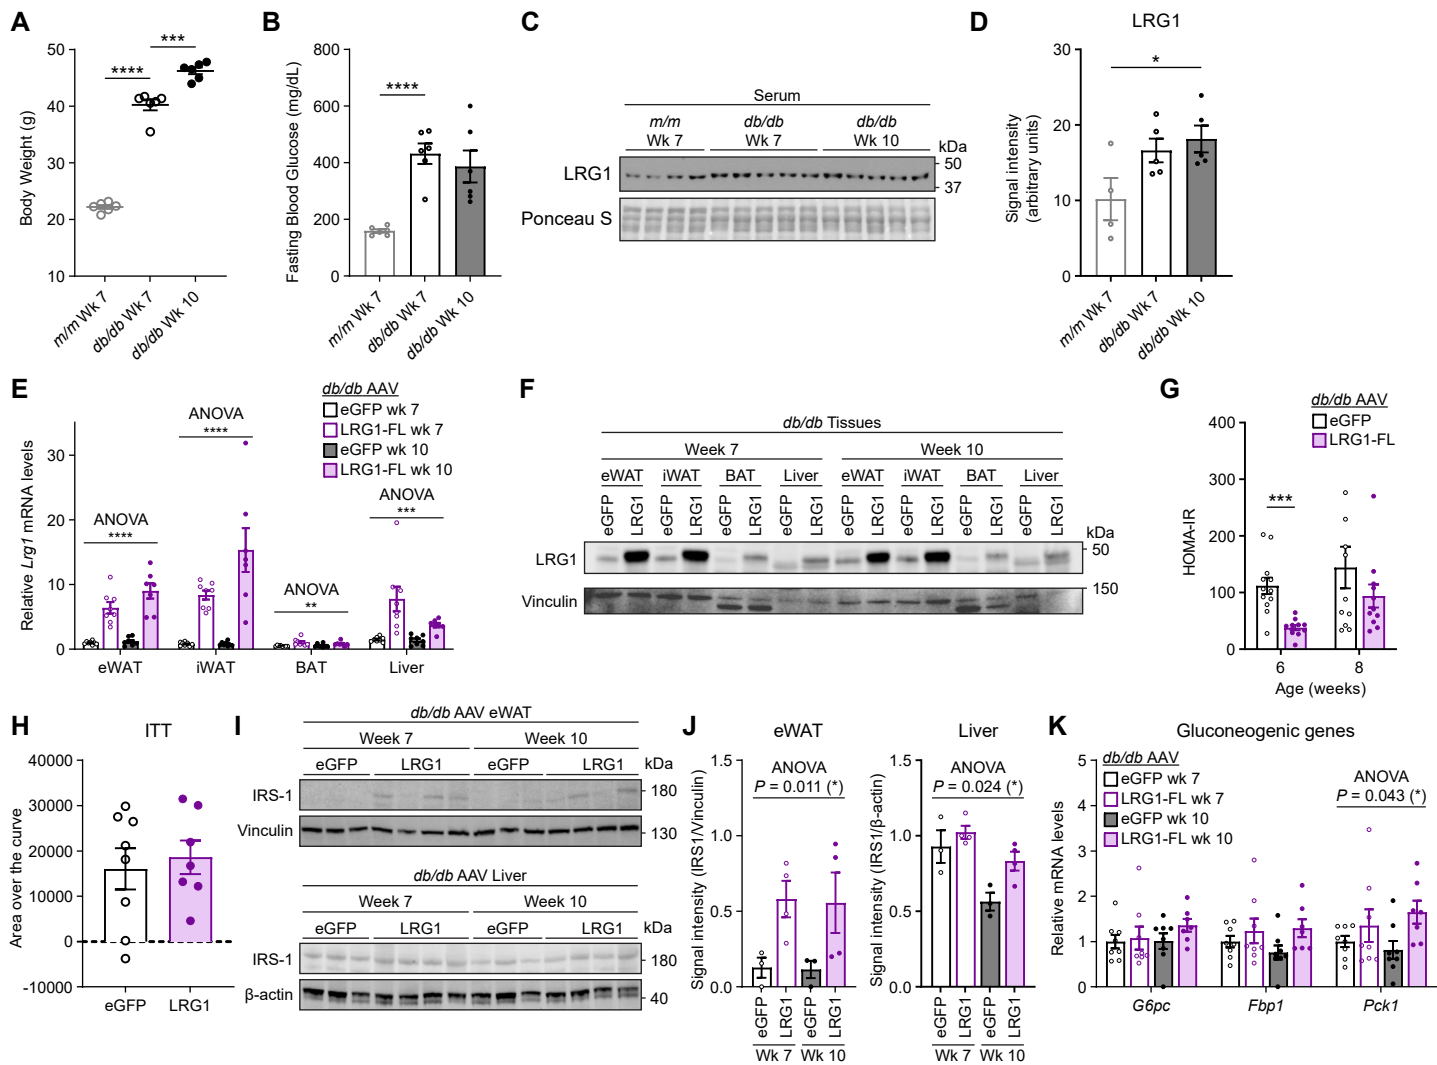

Supplement: supp [file elife-81559-supp-v1.zip]

Figure 7—figure supplement 1

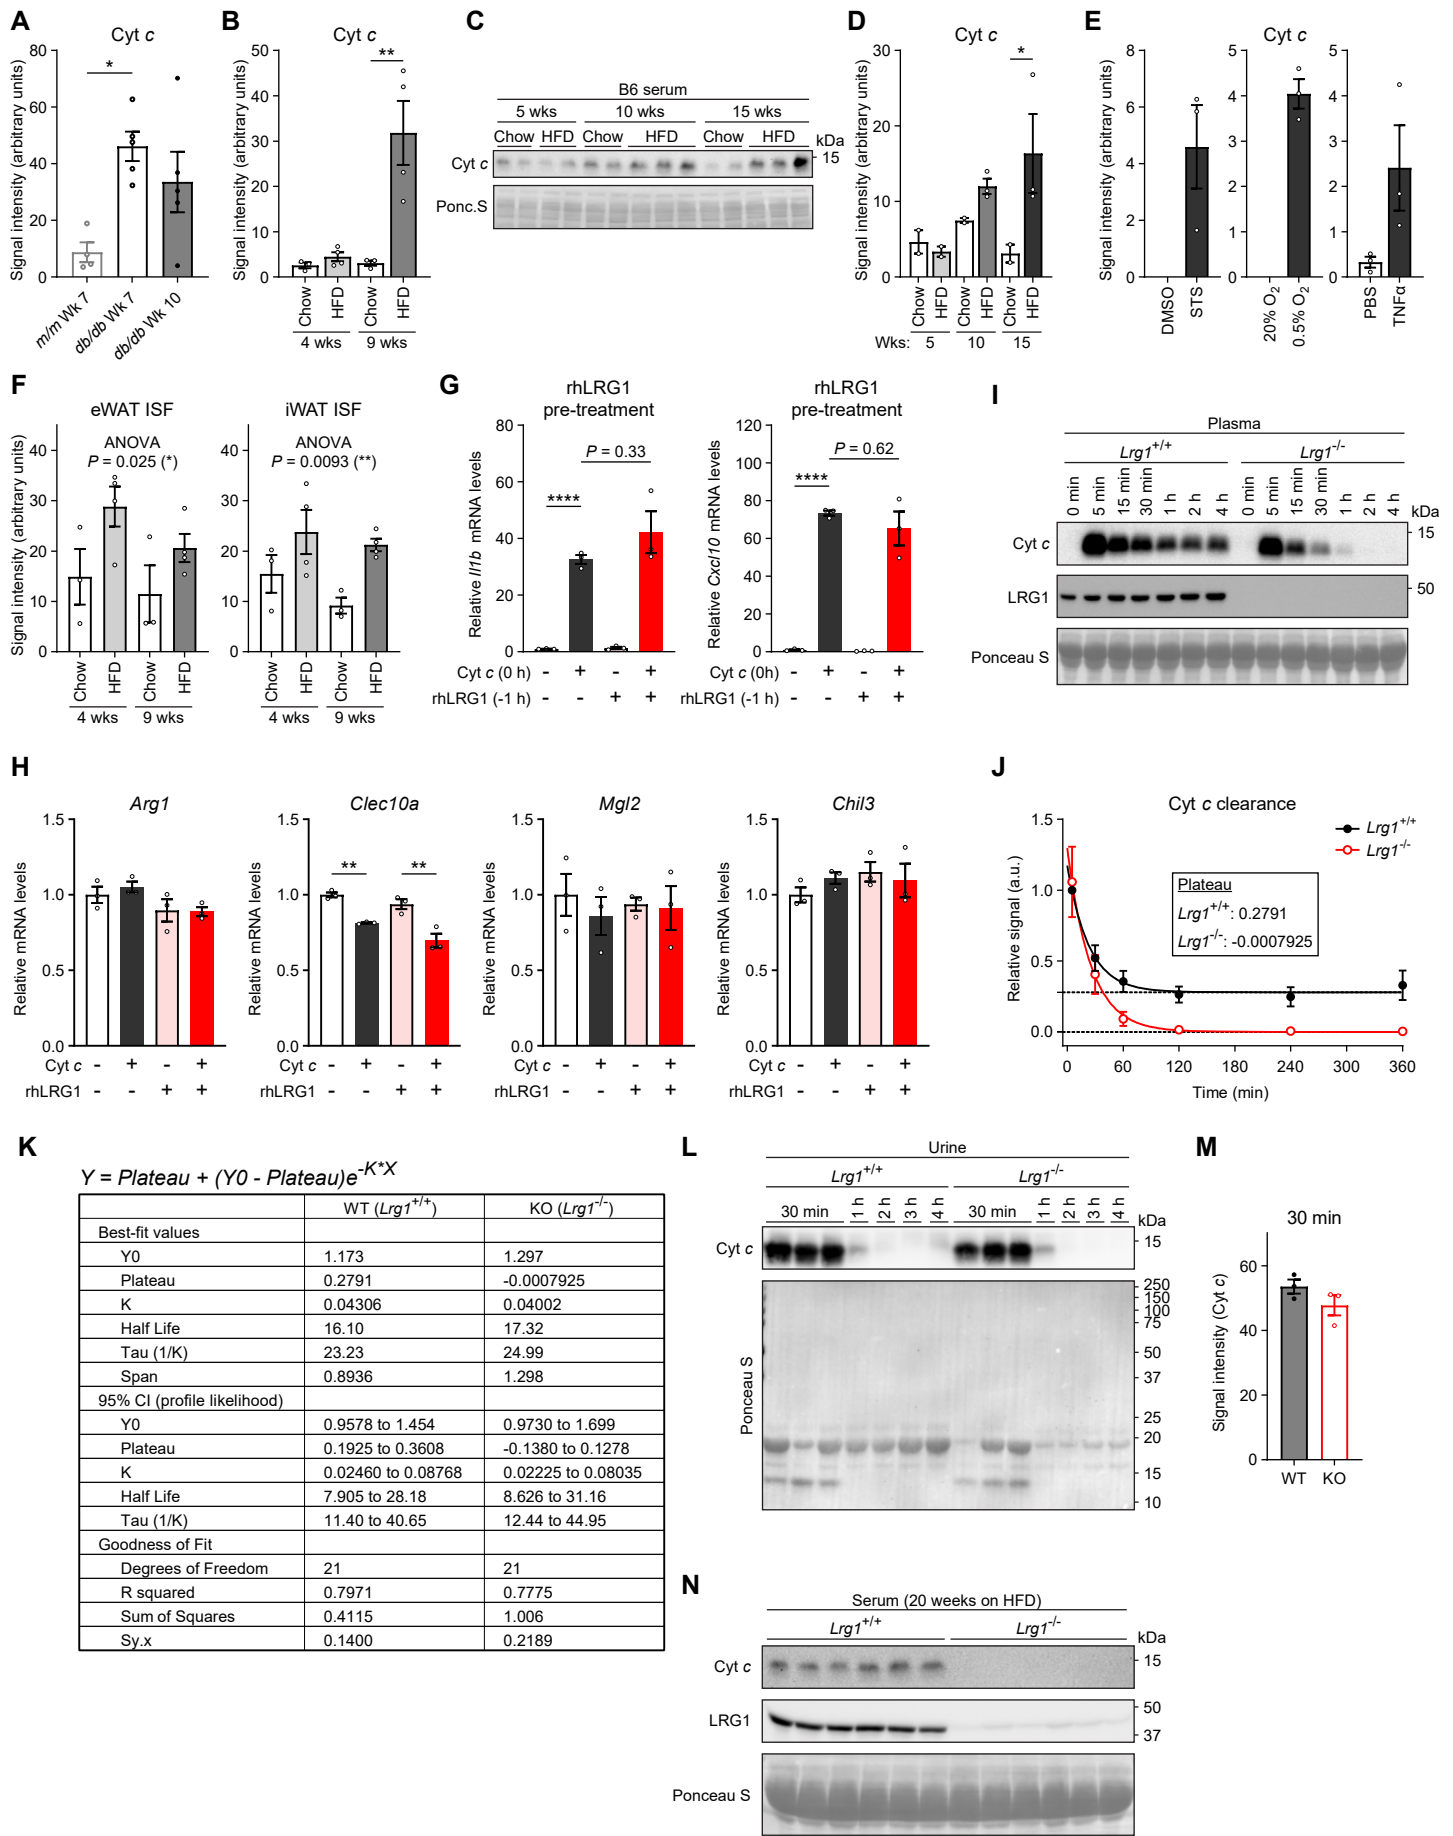

Supplement: supp [file elife-81559-supp-v1.zip]
